# Supplementary material
Source: Springer Nature journal article supplement (https://www.springermedizin.de/resource/supplementary/12984_2012_442_MOESM4_ESM.pdf/9604748)

Differences in mean power of a push

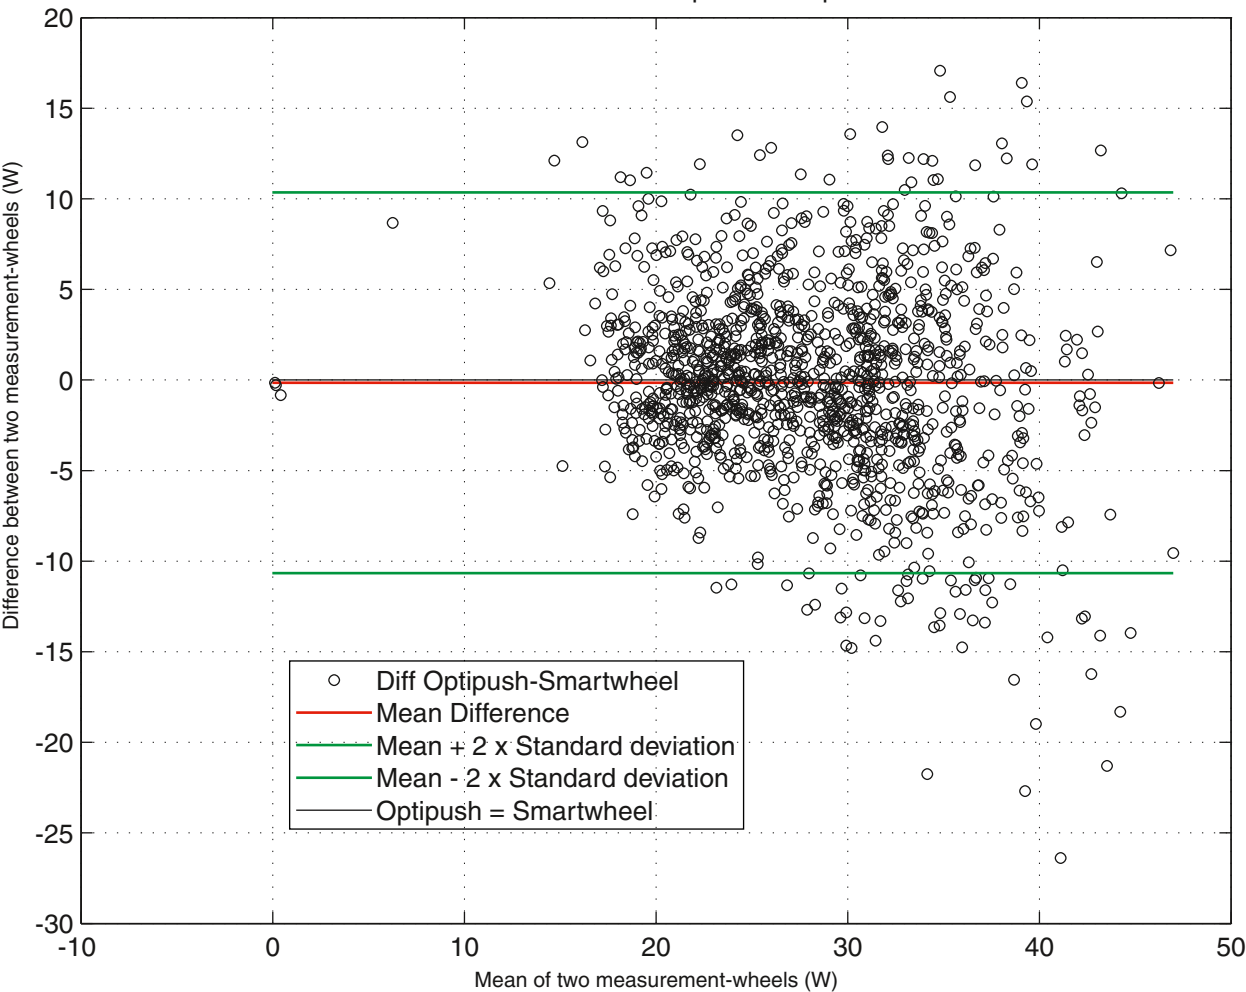

Supplement: MOESM4 [file 9604748]
